# Supplementary material for: Mechanical motion in the solid state and molecular recognition: reversible cis–trans transformation of an organic receptor in a solid–liquid crystalline state reaction triggered by anion exchange
Source: Royal Society of Chemistry journal article supplement (doi:10.1039/c5ce00449g), 2015-01-01
Supplement: c5ce00449g1.pdf [file c5ce00449g1.pdf]

# Electronic Supplementary Information

Mechanical Motion in the Solid State and Molecular Recognition: Reversible Cis-Trans Transformation of an Organic Receptor in a Solid-Liquid Crystalline State Reaction Triggered by Anion Exchange.

Vedichi Madhu, Sabbani Supriya, Ravada Kishore, Indravath K. Naik and Samar K. Das\*

## 1. Synthesis

**A. Synthesis of 1,1''-1,4-phenylene-bis(methylene)bis-4,4'- bipyridinium–bromide  $[C_{28}H_{24}N_4]Br_2$  (1) and 1,1''-1,4-phenylene-bis(methylene)bis-4,4'- bipyridinium–bis(hexafluorophosphate)  $[C_{28}H_{24}N_4](PF_6)_2$**

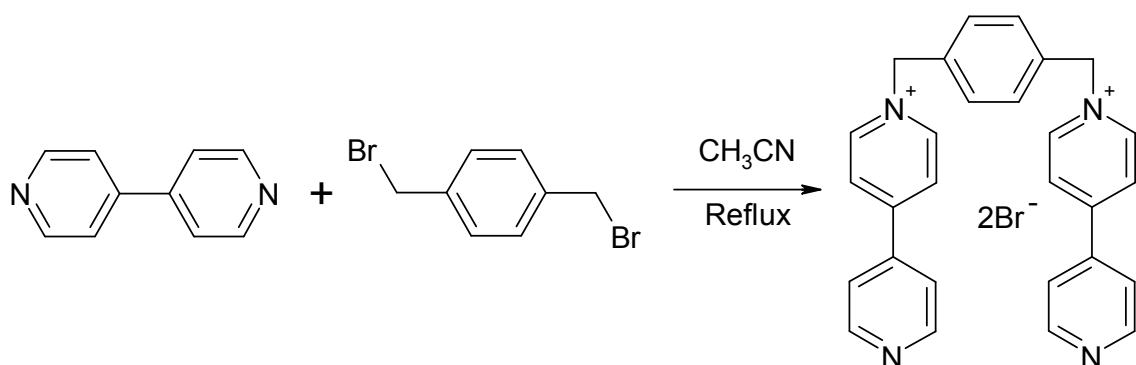

**Scheme S1:**  
Schematic representation for preparation of salt  $[C_{28}H_{24}N_4]Br_2$  and  $PF_6^-$  salt  $[C_{28}H_{24}N_4](PF_6)_2$  of the cation  $[C_{28}H_{24}N_4]^{2+}$  (1c).

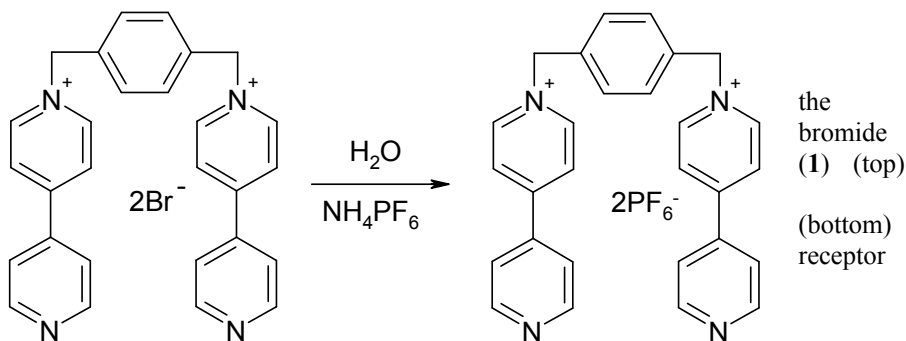

0.15 g

(0.568

mmol) of 1,4-bis(bromomethyl)benzene in 10mL dry acetonitrile was added dropwise to

a refluxing solution of 0.5 g (3.2mmol) of 4,4'-bipyridine in acetonitrile (10mL). The resulting reaction mixture was refluxed for additional 2hrs. The bromide salt  $[\text{C}_{28}\text{H}_{24}\text{N}_4]\text{Br}_2$  (**1**) separated out on cooling to room temperature and the precipitate was filtered, washed with acetonitrile and dried in vacuum. This crude product was dissolved in warm water. The addition of an aqueous solution of  $\text{NH}_4\text{PF}_6$  results in the isolation of  $[\text{C}_{28}\text{H}_{24}\text{N}_4](\text{PF}_6)_2$ . Yield 0.276 g (~70%).

IR (KBr pellet) ( $\text{v}/\text{cm}^{-1}$ ): 3134s, 3074w, 2150w, 1699m, 1639s, 1502m, 1460s, 1421m, 1215s, 1184m, 1010m, 835s, 557s, 515w.

$^1\text{H}$  NMR ( $\text{DMSO}-d_6$ ):  $\delta$  9.28(d,  $J=6.647$ , 4H); 8.81(d,  $J=6.51$ , 4H); 8.62(d,  $J=6.48$ , 4H); 7.97(d,  $J=6.491$ , 4H); 7.66(s, 4H); 5.89(s, 4H).

## B. Synthesis of $[1,1''\text{-}1,4\text{-phenylene-bis(methylene)bis-4,4'\text{-bipyridinium}][\text{Zn}(\text{dmit})_2]$ , $[\text{C}_{28}\text{H}_{24}\text{N}_4][\text{Zn}(\text{dmit})_2] \cdot 2\text{DMF}$ (**2**)

0.07 g (0.1mmol) of  $[\text{C}_{28}\text{H}_{24}\text{N}_4](\text{PF}_6)_2$  (see scheme S1) was dissolved in  $\text{CH}_3\text{CN}$ . Subsequently, a  $\text{CH}_3\text{CN}$  solution of  $[\text{Bu}_4\text{N}]_2[\text{Zn}(\text{dmit})_2]$  (0.094 g, 0.1mmol) was added to this, whereby a brown color precipitate was formed immediately. The precipitate was filtered, washed with ether and dried in air. Compound  $[\text{C}_{28}\text{H}_{24}\text{N}_4][\text{Zn}(\text{dmit})_2] \cdot 2\text{DMF}$  (**3**) was crystallized from this precipitate in DMF/ ether system (crystallization time duration: 3-4 days at room temperature) as shown in Scheme S2.

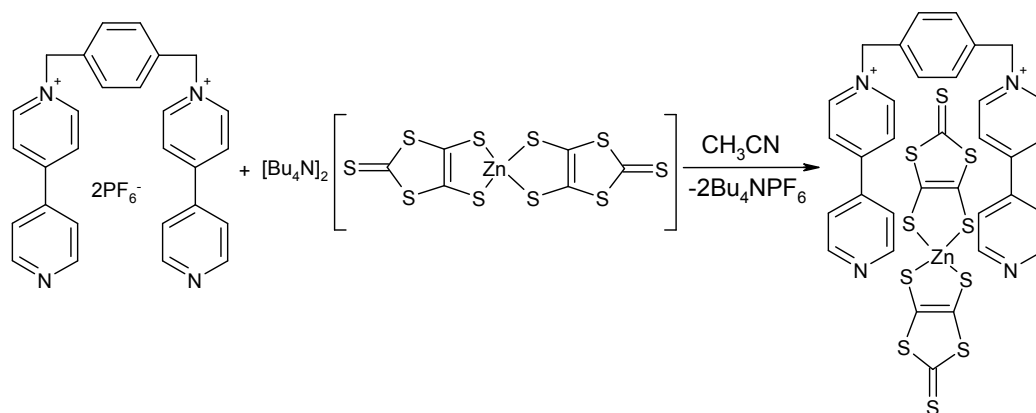

**Scheme S2:** Schematic representation for the preparation of  $[\text{C}_{28}\text{H}_{24}\text{N}_4][\text{Zn}(\text{dmit})_2] \cdot 2\text{DMF}$  (**2**)

Yield: 0.09 g (90%). IR (KBr pellet) ( $\text{v}/\text{cm}^{-1}$ ) for **2**: 3036m, 1658s, 1635s, 1543m, 1406s, 1215m, 1159m, 1055s, 1028s, 993m, 887m, 790s, 729m, 459s.

$^1\text{H}$  NMR ( $\text{DMSO}-d_6$ ):  $\delta$  (ppm) 9.32(d,  $J=6.847$ , 4H); 8.85(d,  $J=4.891$ , 4H); 8.862(d,  $J=5.869$ , 4H); 7.99(d,  $J=4.891$ , 4H); 7.66(s, 4H); 5.89(s, 4H).

$^{13}\text{C}$  NMR (DMSO- $d_6$ ): 31.24, 62.94, 122.42, 126.36, 130.11, 135.80, 141.22, 145.82, 151.46, 153.37, 162.78, 207.31.

### C. Synthesis via solid liquid interface reactions: solid to solid transformation without dissolution of the solid

$[\text{C}_{28}\text{H}_{24}\text{N}_4][\text{Zn}(\text{dmit})_2] \cdot 2\text{DMF}$  (**2**) (solid phase) +  $[\text{Bu}_4\text{N}]\text{Br}$  (soln. phase)

$\rightleftharpoons [\text{C}_{28}\text{H}_{24}\text{N}_4]\text{Br}_2$  (**1**) (solid phase) +  $[\text{Bu}_4\text{N}]_2[\text{Zn}(\text{dmit})_2]$  (soln. phase)

(equation 1)

#### Forward reaction of equation 1 (compound 1 from compound 2)

The compound  $[\text{C}_{28}\text{H}_{24}\text{N}_4][\text{Zn}(\text{dmit})_2] \cdot 2\text{DMF}$  (**2**) (0.370 g, 0.42 mmol) was suspended in saturated MeCN solution (compound **2** is not soluble in MeCN) of  $[\text{Bu}_4\text{N}]\text{Br}$  (0.540 g, 1.68 mmol); the crystals of compound **2** lose the color by removing the coordination complex  $[\text{Zn}(\text{dmit})_2]^{2-}$  into the solution with the formation of pink-colored MeCN solution of  $[\text{Bu}_4\text{N}]_2[\text{Zn}(\text{dmit})_2]$  (freely soluble in MeCN) resulting in colorless crystals of compound  $[\text{C}_{28}\text{H}_{24}\text{N}_4]\text{Br}_2$  (**1**) (0.120 g), which were separated and air dried. The pink-colored MeCN solution of  $[\text{Bu}_4\text{N}]_2[\text{Zn}(\text{dmit})_2]$  was stored in an open beaker and evaporated at an ambient condition, whereby the solid crystals of  $[\text{Bu}_4\text{N}]_2[\text{Zn}(\text{dmit})_2]$  appeared. This compound was filtered, washed with isopropyl alcohol followed by diethylether. The identity of this solid as  $[\text{Bu}_4\text{N}]_2[\text{Zn}(\text{dmit})_2]$  is confirmed by comparing its PXRD pattern with that, simulated from single crystal data of the reported  $[\text{Bu}_4\text{N}]_2[\text{Zn}(\text{dmit})_2]$  (Fig. S13, section 3C). It was also characterized by IR spectral studies (Fig. S12, section 3B).

#### Reverse reaction of equation 1 (compound 2 from compound 1)

The off-white organic salt  $[\text{C}_{28}\text{H}_{24}\text{N}_4]\text{Br}_2$  (**1**) (0.450 g, 0.6 mmol) and the colored coordination compound  $[\text{Bu}_4\text{N}]_2[\text{Zn}(\text{dmit})_2]$  (2.1 g, 2.2 mmol) were added to the MeCN solvent (50 mL) containing dimethylformamide (2.5 mL), and this reaction mixture was stirred at room temperature for seven days ( $[\text{C}_{28}\text{H}_{24}\text{N}_4]\text{Br}_2$  (**1**) is not soluble in this medium, but  $[\text{Bu}_4\text{N}]_2[\text{Zn}(\text{dmit})_2]$  is freely soluble). During this time, the off-white solid becomes colored by anion exchange (colored complex anion  $[\text{Zn}(\text{dmit})_2]^{2-}$  gets into the crystal from solution phase and  $\text{Br}^-$  comes out to the solution from the solid phase). After

seven days of stirring, the reaction mixture was filtered and the colored solid was washed with acetonitrile and hexane and the resulting compound  $[\text{C}_{28}\text{H}_{24}\text{N}_4][\text{Zn}(\text{dmit})_2] \cdot 2\text{DMF}$  (**2**) (0.460 g) was dried under air.

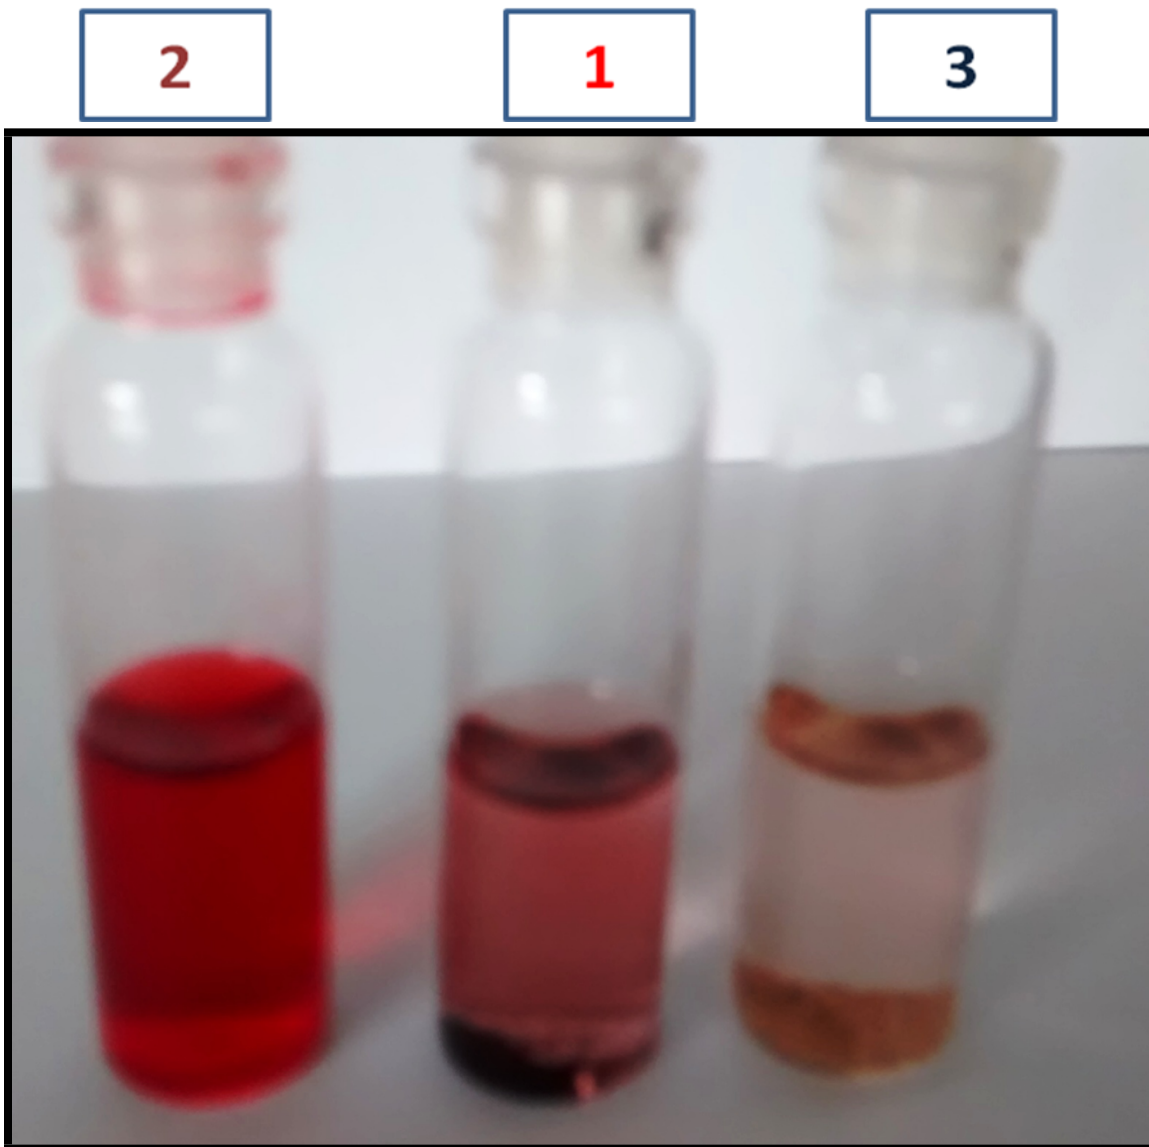

**Scheme S3:** **1**,  $[\text{C}_{28}\text{H}_{24}\text{N}_4][\text{Zn}(\text{dmit})_2] \cdot 2\text{DMF}$  (**2**) suspended in MeCN dissolving  $\text{Bu}_4\text{NBr}$ ; **2**,  $[\text{Bu}_4\text{N}]_2[\text{Zn}(\text{dmit})_2]$  solution in MeCN, obtained by stirring **1** at room temperature for 5 minute; **3**,  $[\text{C}_{28}\text{H}_{24}\text{N}_4]\text{Br}_2$  (**1**) suspended in MeCN, obtained by stirring **1** at room temperature for 5 minute followed by decanting the MeCN solution of  $[\text{Bu}_4\text{N}]_2[\text{Zn}(\text{dmit})_2]$  (shown in **2**) and adding MeCN for washing.

## 2. Crystallography

### A. Crystal structure of $[\text{C}_{28}\text{H}_{24}\text{N}_4][\text{Zn}(\text{dmit})_2] \cdot 2\text{DMF}$ (**2**)

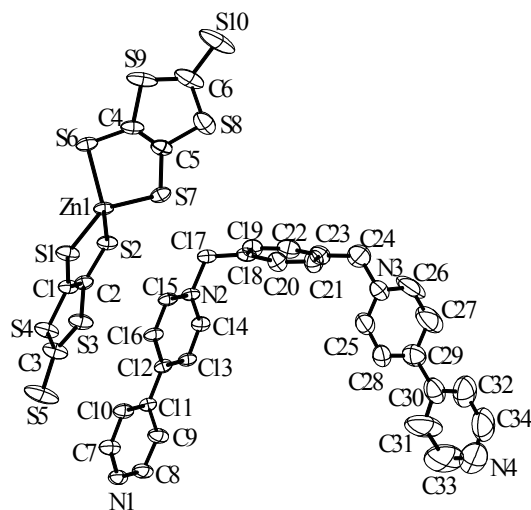

**Fig. S1.** Thermal ellipsoidal plot of the  $[\text{C}_{28}\text{H}_{24}\text{N}_4][\text{Zn}(\text{dmit})_2]$  in **2**. Hydrogen atoms and solvent molecules are not shown for clarity.

The usual *trans* conformation of the cation receptor  $[\text{C}_{28}\text{H}_{24}\text{N}_4]^{2+}$  (**1c**), found in the crystal structure of compound  $[\text{C}_{28}\text{H}_{24}\text{N}_4]\text{Br}_2$  (**1**) as shown in Fig. 1 (right) in the main article, is transformed to a cleft-like *cis*-form (Fig. S2) when it associates with  $[\text{Zn}(\text{dmit})_2]^{2-}$  anion resulting in the formation of compound  $[\text{C}_{28}\text{H}_{24}\text{N}_4][\text{Zn}(\text{dmit})_2] \cdot 2\text{DMF}$  (**2**). This conformational change occurs through molecular recognition of an inorganic coordination complex anion  $[\text{Zn}(\text{dmit})_2]^{2-}$  by the cation receptor  $[\text{C}_{28}\text{H}_{24}\text{N}_4]^{2+}$  (**1c**). The complex anion,  $[\text{Zn}(\text{dmit})_2]^{2-}$  exerts  $\pi$ - $\pi$  stacking interactions to the six-membered aromatic rings of the organic dication as shown in Figs. S2-S4.

$\pi$ - $\pi$  Stacking interactions among the organic dications (cation receptors **1c**) are shown in Fig. S4.  $\pi$ - $\pi$  Stacking interactions among the receptor cations and  $\pi$ - $\pi$  stacking interactions between cation receptor  $[\text{C}_{28}\text{H}_{24}\text{N}_4]^{2+}$  and coordination complex anion  $[\text{Zn}(\text{dmit})_2]^{2-}$  are together shown in Figs. S3-S4 resulting in the formation of supramolecular zipper (Fig. 2, main article).

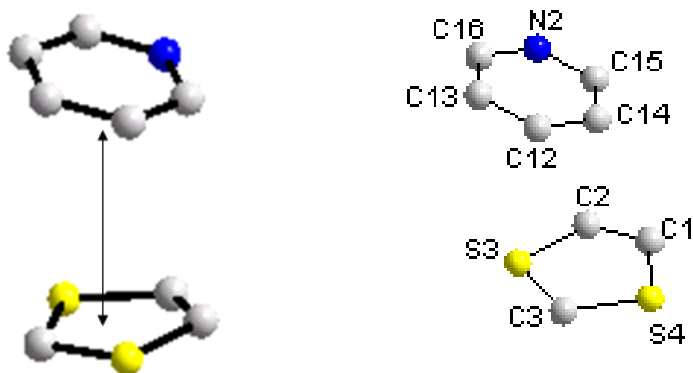

**Fig. S2.** The origin of  $\pi$ - $\pi$  interaction between five member ring (C1, C2, C3, S3, S4) of  $[\text{Zn}(\text{dmit})_2]^{2-}$  and six member ring (C12, C13, C14, C15, C16, N2) of bipyridinium unit. ( $\pi$ - $\pi$  interactions between cation the  $[\text{C}_{28}\text{H}_{24}\text{N}_4]^{2+}$  and anion  $[\text{Zn}(\text{dmit})_2]^{2-}$  :  $\text{C}_t\text{-C}_t = 3.928(6)\text{\AA}$ ,  $\text{MPS} = 3.462\text{\AA}$ ;  $\text{C}_t\text{-C}_t$  = centroid-centroid distance and MPS = mean plane separation).

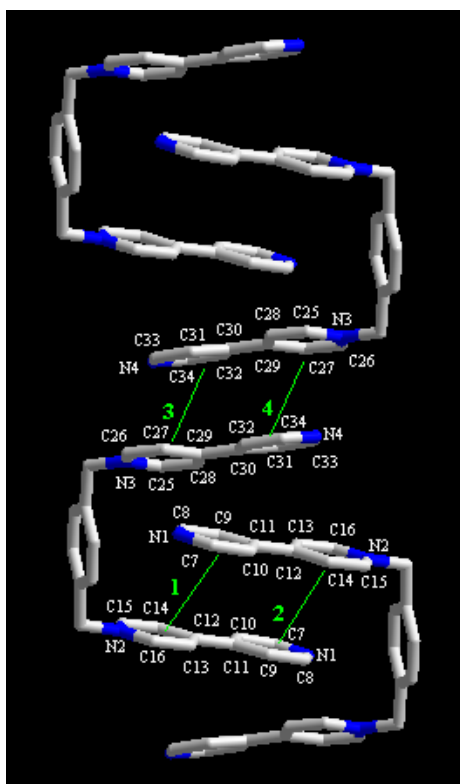

**Fig. S3.**  $\pi$ - $\pi$  interactions: 1 and 2:  $\text{C}_t\text{-C}_t = 3.773(3)\text{ \AA}$ ,  $\text{MPS} = 3.54\text{\AA}$ ; 3 and 4:  $\text{C}_t\text{-C}_t = 3.533(6)\text{ \AA}$ ,  $\text{MPS} = 3.359\text{\AA}$ .  $\text{C}_t\text{-C}_t$  = centroid-to-centroid distances; MPS = mean plane separations. Color code: C, gray; N, blue.

1 :  $\pi$ - $\pi$  interactions between {N2-C15-C14-C12-C13-C16} ring and {N1-C8-C9-C11-C10-C7} ring; 2:  $\pi$ - $\pi$  interactions between { N1-C8-C9-C11-C10-C7} ring and { N2-C15-C14-C12-C13-C16} ring; 3:  $\pi$ - $\pi$  interactions between {N3-C25-C28-C29-C27-C26} ring and { N4-C34-C32-C30-C31-C33}ring; 4:  $\pi$ - $\pi$  interactions between { N4-C34-C32-C30-C31-C33} ring and { N3-C25-C28-C29-C27-C26} ring.

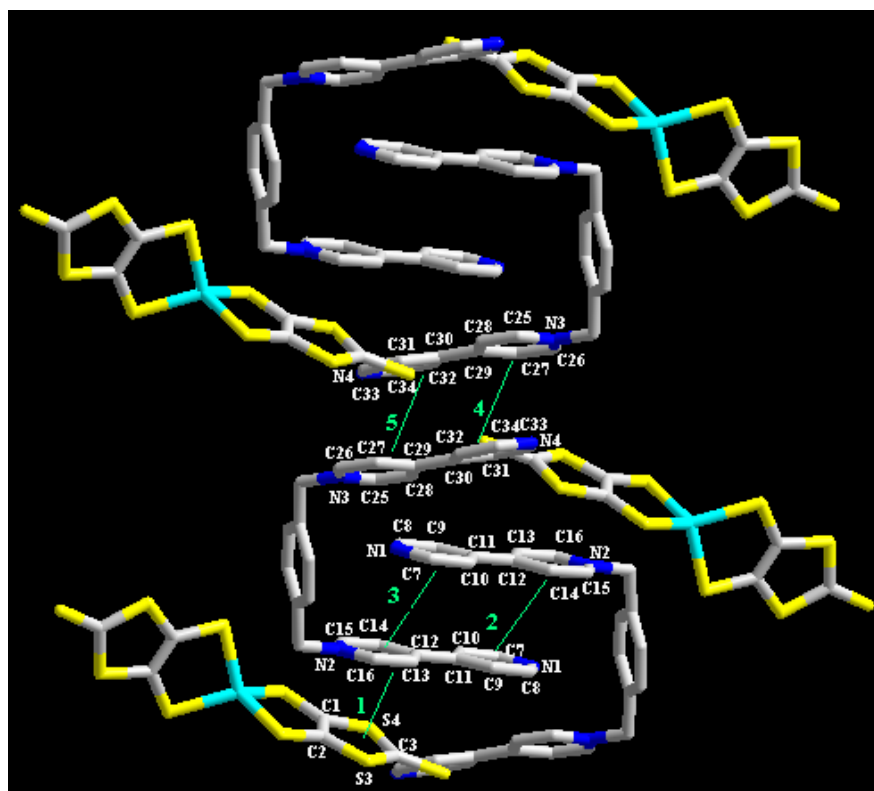

**Fig. S4.**  $\pi$ - $\pi$  interactions: 1:  $C_t-C_t = 3.928(3)$  Å, MPS = 3.462Å; 3 and 2:  $C_t-C_t = 3.773(3)$  Å, MPS = 3.54Å; 5 and 4:  $C_t-C_t = 3.533(6)$  Å, MPS = 3.359Å.  $C_t-C_t$  = centroid-to-centroid distances; MPS = mean plane separations. Color code: C, gray; N, blue; Zn, cyan; S, yellow.

1 :  $\pi$ - $\pi$  interactions between {C1-C2-S3-C3-S4} ring and {N2-C15-C14-C12-C13-C16} ring; 2:  $\pi$ - $\pi$  interactions between {N2-C15-C14-C12-C13-C16} ring and {N1-C8-C9-C11-C10-C7} ring; 3:  $\pi$ - $\pi$  interactions between { N1-C8-C9-C11-C10-C7} ring and { N2-C15-C14-C12-C13-C16} ring; 4:  $\pi$ - $\pi$  interactions between { N3-C25-C28-C29-C27-C26} ring and { N4-C34-C32-C30-C31-C33} ring; 5:  $\pi$ - $\pi$  interactions between { N4-C34-C32-C30-C31-C33} ring and { N3-C25-C28-C29-C27-C26} ring.

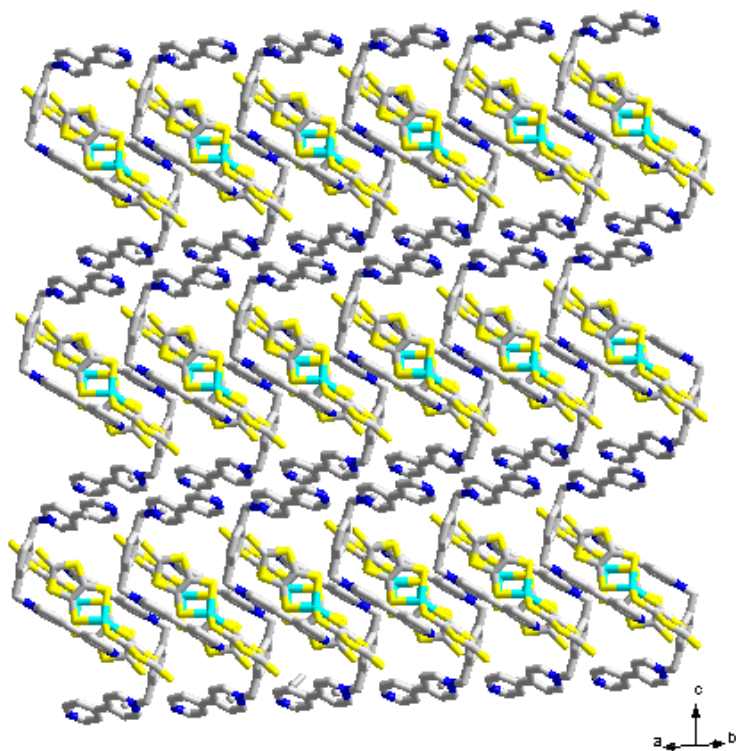

**Fig. S5.** View (wire-frame representation) of the molecular packing of  $[\text{C}_{28}\text{H}_{24}\text{N}_4][\text{Zn}(\text{dmit})_2] \cdot 2\text{DMF}$  (**2**) ( $3 \times 3$ ) cells. Color code: Zn, cyan; N, blue; C, gray; S, yellow. The hydrogen atoms and solvent molecules are not shown for clarity.

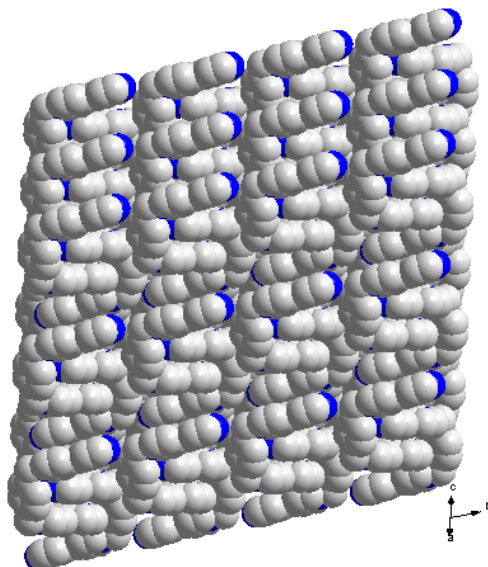

**Fig. S6.** View (space-filling representation) of the  $[\text{C}_{28}\text{H}_{24}\text{N}_4]^{2+}$  cation arrangement in the  $[\text{C}_{28}\text{H}_{24}\text{N}_4][\text{Zn}(\text{dmit})_2] \cdot 2\text{DMF}$  (**2**) ( $3 \times 3$ ) cells. Color code: N, blue; C, gray.

### **3. Spectroscopy**

#### **A. NMR spectroscopy**

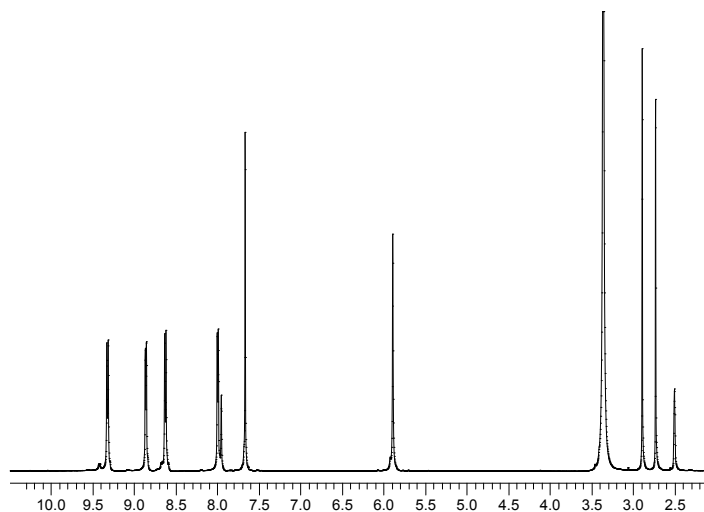



**Fig. S7.**  $^1\text{H}$  NMR spectrum of  $[\text{C}_{28}\text{H}_{24}\text{N}_4][\text{Zn}(\text{dmit})_2] \cdot 2\text{DMF}$  (**2**) at 298K.

## B. IR spectroscopy

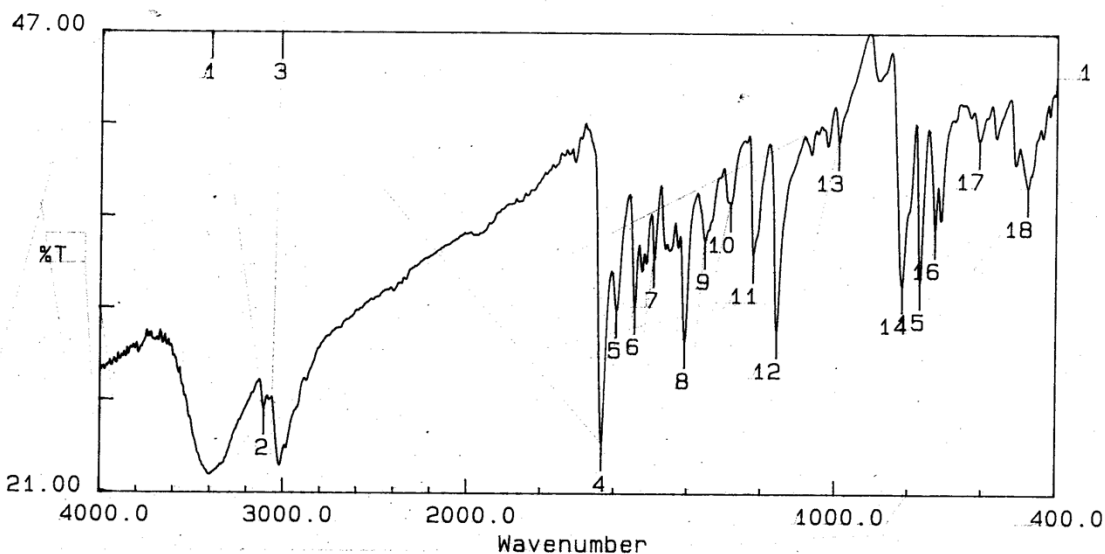

**Fig. S8.** IR spectrum of  $[\text{C}_{28}\text{H}_{24}\text{N}_4]\text{Br}_2$  (**1**), obtained from the solid-liquid interphase reaction of  $[\text{C}_{28}\text{H}_{24}\text{N}_4][\text{Zn}(\text{dmit})_2] \cdot 2\text{DMF}$  (**2**) with  $[\text{Bu}_4\text{N}]\text{Br}$  dissolved in MeCN solution (solid to solid conversion).

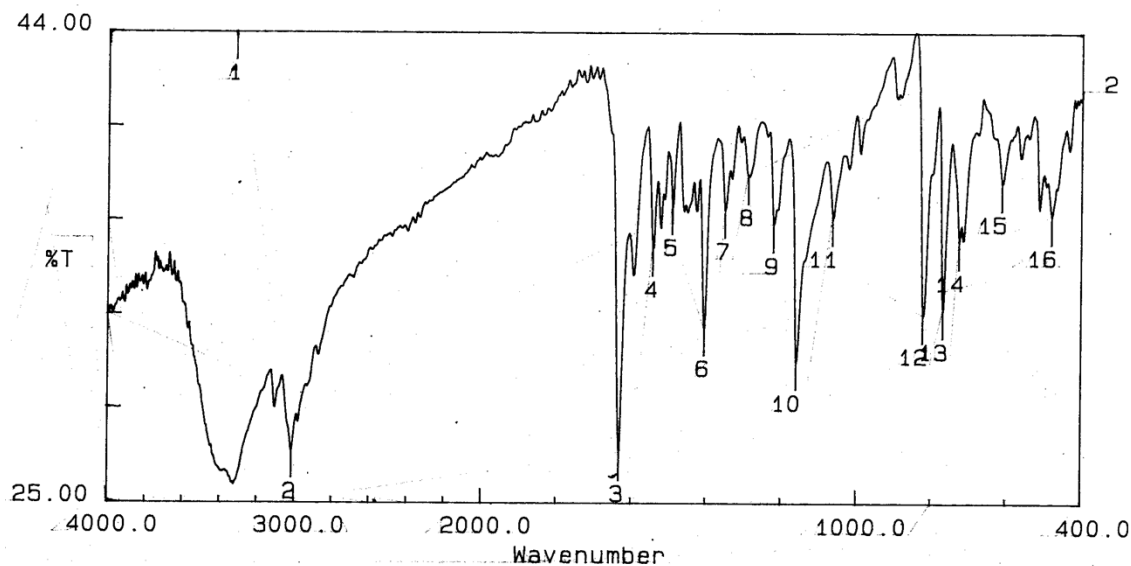

**Fig. S9.** IR spectrum of parent  $[\text{C}_{28}\text{H}_{24}\text{N}_4]\text{Br}_2$  (**1**), obtained in a direct synthesis (described in section 1A and scheme S1).

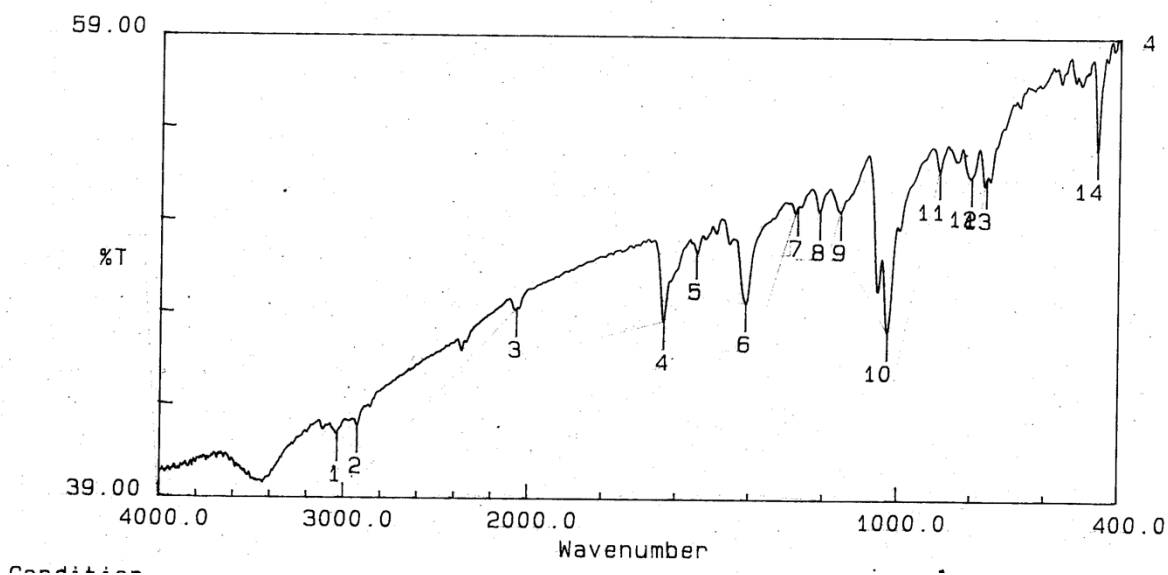

**Fig. S10.** IR spectrum of the parent  $[\text{C}_{28}\text{H}_{24}\text{N}_4][\text{Zn}(\text{dmit})_2] \cdot 2\text{DMF}$  (**2**), obtained by the reaction shown in Scheme S2 (Section 1B)

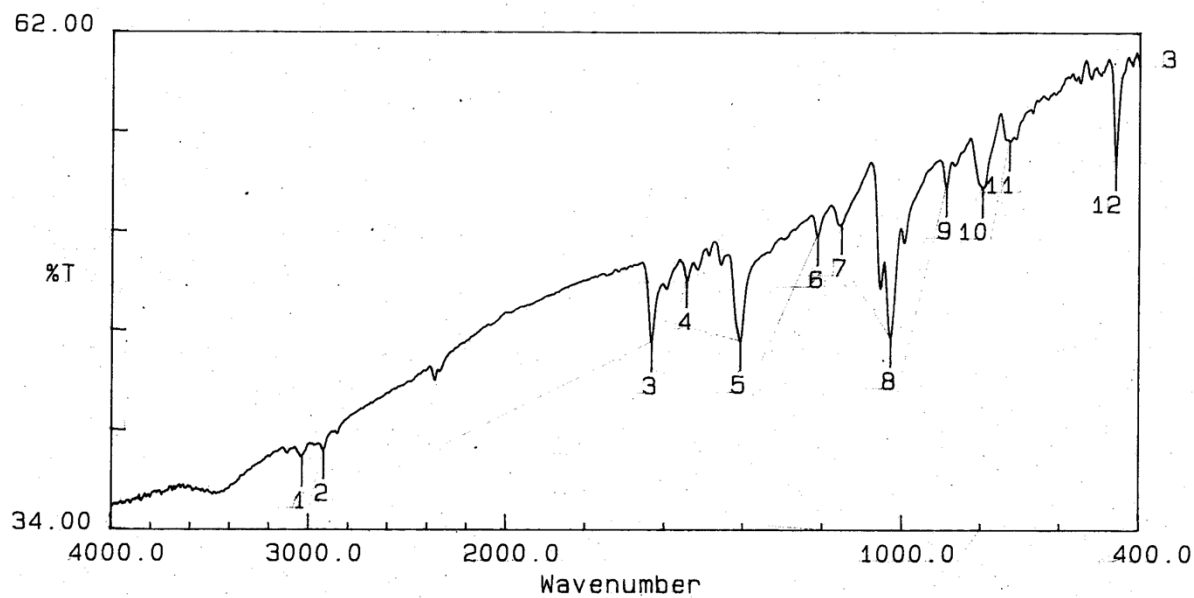

**Fig. S11.** IR spectrum of the solid  $[\text{C}_{28}\text{H}_{24}\text{N}_4][\text{Zn}(\text{dmit})_2] \cdot 2\text{DMF}$  (**2**), obtained by the solid-liquid interface reaction shown in reverse reaction of equation 1 (Section 1C)

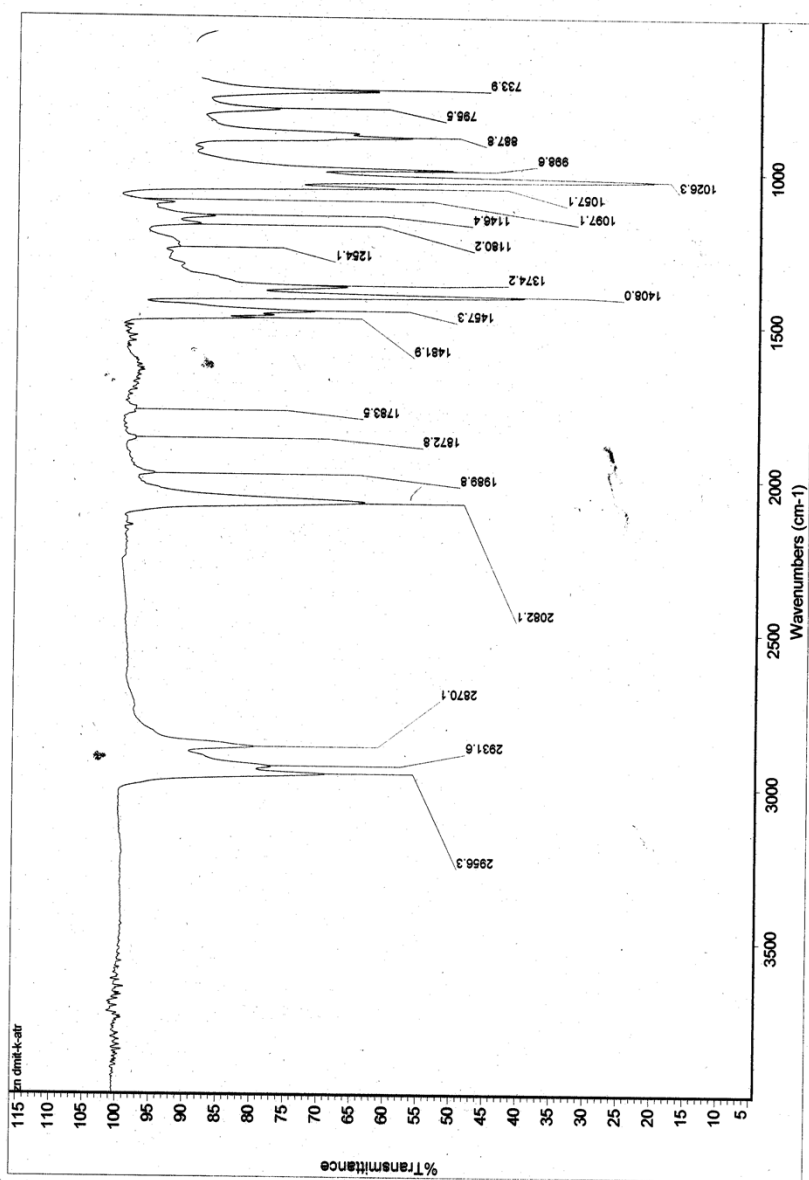

**Fig. S12.** IR spectrum of the solid  $[\text{Bu}_4\text{N}]_2[\text{Zn}(\text{dmit})_2]$ , obtained by the solid-liquid interface reaction as shown in the forward reaction of equation 1 (Section 1C)

### **C. Powder X-ray Diffraction Patterns (PXRDs)**

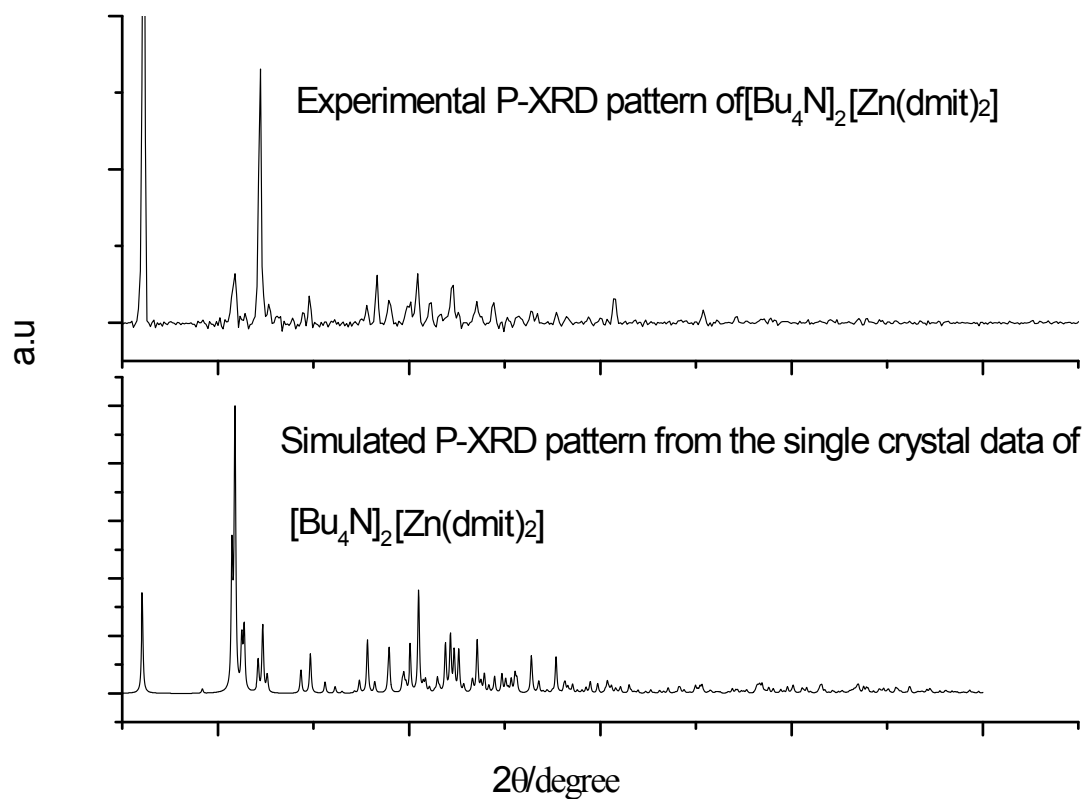

**Fig. S13.** Powder X-ray diffraction patterns of compound  $[\text{Bu}_4\text{N}]_2[\text{Zn}(\text{dmit})_2]$ : top, obtained by the solid-liquid interface reaction as shown in the forward reaction of equation 1 (Section 1C); bottom, simulated from single crystal data of  $[\text{Bu}_4\text{N}]_2[\text{Zn}(\text{dmit})_2]$  (from reference: Zhao, X.; Wang, Y. L.; Zhang, B. P.; Qin, Y. M.; Yao, J.; Jiang, G. C. *Z. Kristallogr. NCS* **2011**, 226, 251-253).

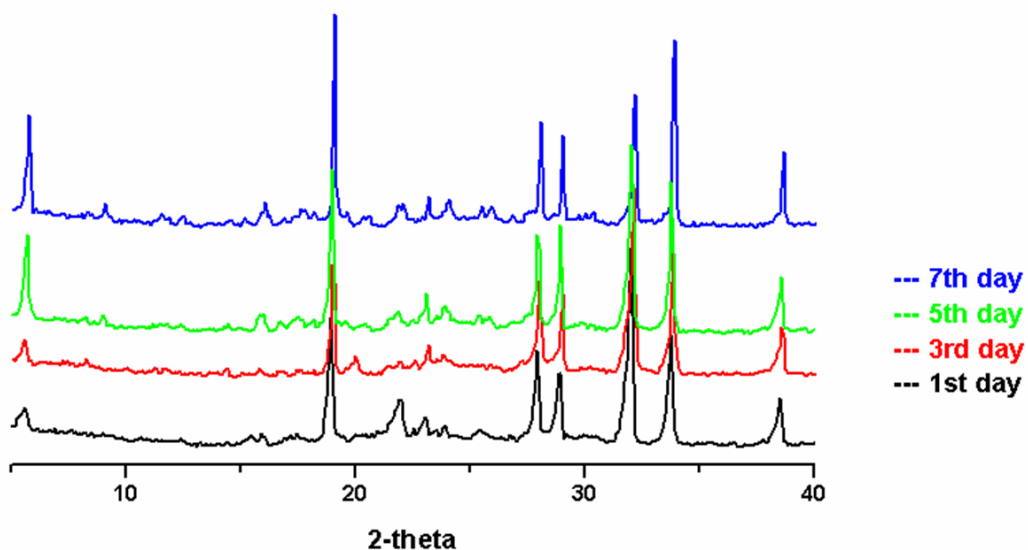

**Fig. S14.** Powder X-ray diffraction patterns of the intermediate products, obtained by stirring the suspension of  $[\text{C}_{28}\text{H}_{24}\text{N}_4]\text{Br}_2$  (**1**) (solid phase) in MeCN solution of  $[\text{Bu}_4\text{N}]_2[\text{Zn}(\text{dmit})_2]$  (soln. phase). PXRD patterns were taken after one day, after three days, after five days and finally after seven days.

## 4. Tables

**Table S1.** Crystal Data and Structural Refinement for Compound  $[\text{C}_{28}\text{H}_{24}\text{N}_4][\text{Zn}(\text{dmit})_2] \cdot 2\text{DMF}$  (**2**)

| Compound <b>2</b>           |                                                                                                                                          |
|-----------------------------|------------------------------------------------------------------------------------------------------------------------------------------|
| Empirical formula           | C34 H24 N4 S10 Zn                                                                                                                        |
| Formula weight              | 874.54                                                                                                                                   |
| Temperature                 | 100(2) K                                                                                                                                 |
| Wavelength                  | 0.71073 Å                                                                                                                                |
| Crystal system, space group | Triclinic, P-1                                                                                                                           |
| Unit cell dimensions        | $a = 11.011(3)$ Å $\alpha = 71.519(5)$ deg.<br>$b = 11.867(4)$ Å $\beta = 79.676(5)$ deg.<br>$c = 18.154(6)$ Å $\gamma = 87.614(5)$ deg. |

|                                   |                                             |
|-----------------------------------|---------------------------------------------|
| Volume                            | 2213.1(12) Å <sup>3</sup>                   |
| Z, Calculated density             | 2, 1.312 Mg/m <sup>3</sup>                  |
| Absorption coefficient            | 1.054 mm <sup>-1</sup>                      |
| F(000)                            | 892                                         |
| Crystal size                      | 0.4 x 0.3 x 0.2 mm                          |
| Theta range for data collection   | 1.81 to 24.71 deg.                          |
| Limiting indices                  | -12 ≤ h ≤ 12, -13 ≤ k ≤ 13, -21 ≤ l ≤ 21    |
| Reflections collected / unique    | 20337 / 7508 [R(int) = 0.0370]              |
| Completeness to theta = 24.71     | 99.7 %                                      |
| Absorption correction             | None                                        |
| Refinement method                 | Full-matrix least-squares on F <sup>2</sup> |
| Data / restraints / parameters    | 7508 / 93 / 452                             |
| Goodness-of-fit on F <sup>2</sup> | 1.112                                       |
| Final R indices [I > 2σ(I)]       | R1 = 0.0691, wR2 = 0.1876                   |
| R indices (all data)              | R1 = 0.0847, wR2 = 0.1992                   |
| Largest diff. peak and hole       | 1.722 and -0.798 e.Å <sup>-3</sup>          |

---

**Table S2. Bond lengths [Å] and angles [°] for [C<sub>28</sub>H<sub>24</sub>N<sub>4</sub>][Zn(dmit)<sub>2</sub>]·2DMF (2)**

---

|             |           |
|-------------|-----------|
| C(1)-C(2)   | 1.353(8)  |
| C(1)-S(1)   | 1.741(6)  |
| C(1)-S(4)   | 1.743(6)  |
| C(2)-S(3)   | 1.742(6)  |
| C(2)-S(2)   | 1.746(6)  |
| C(3)-S(5)   | 1.661(7)  |
| C(3)-S(4)   | 1.711(7)  |
| C(3)-S(3)   | 1.723(7)  |
| C(4)-C(5)   | 1.349(10) |
| C(4)-S(6)   | 1.737(7)  |
| C(4)-S(9)   | 1.753(6)  |
| C(5)-S(8)   | 1.744(7)  |
| C(5)-S(7)   | 1.753(7)  |
| C(6)-S(10B) | 1.691(17) |
| C(6)-S(10A) | 1.693(17) |
| C(6)-S(8)   | 1.725(8)  |
| C(6)-S(9)   | 1.733(8)  |
| C(7)-N(1)   | 1.325(8)  |
| C(7)-C(10)  | 1.384(8)  |
| C(8)-N(1)   | 1.331(8)  |
| C(8)-C(9)   | 1.378(9)  |
| C(9)-C(11)  | 1.381(8)  |
| C(10)-C(11) | 1.386(8)  |
| C(11)-C(12) | 1.493(8)  |
| C(12)-C(13) | 1.390(8)  |
| C(12)-C(14) | 1.394(8)  |
| C(13)-C(16) | 1.364(8)  |
| C(14)-C(15) | 1.370(8)  |
| C(15)-N(2)  | 1.346(7)  |
| C(16)-N(2)  | 1.343(7)  |
| C(17)-N(2)  | 1.493(7)  |
| C(17)-C(18) | 1.512(9)  |
| C(18)-C(19) | 1.374(9)  |
| C(18)-C(20) | 1.396(9)  |
| C(19)-C(22) | 1.375(10) |
| C(20)-C(21) | 1.370(10) |
| C(21)-C(23) | 1.396(10) |
| C(22)-C(23) | 1.368(10) |
| C(23)-C(24) | 1.509(11) |
| C(24)-N(3)  | 1.468(10) |
| C(25)-C(28) | 1.311(11) |
| C(25)-N(3)  | 1.319(10) |



|               |            |
|---------------|------------|
| C(26)-N(3)    | 1.287(12)  |
| C(26)-C(27)   | 1.404(16)  |
| C(27)-C(29)   | 1.424(14)  |
| C(28)-C(29)   | 1.326(11)  |
| C(29)-C(30)   | 1.466(12)  |
| C(30)-C(32)   | 1.326(13)  |
| C(30)-C(31)   | 1.371(15)  |
| C(31)-C(33)   | 1.441(18)  |
| C(32)-C(34)   | 1.402(16)  |
| C(33)-N(4)    | 1.289(15)  |
| C(34)-N(4)    | 1.248(14)  |
| S(1)-Zn(1)    | 2.3239(17) |
| S(2)-Zn(1)    | 2.3430(16) |
| S(6)-Zn(1)    | 2.3507(17) |
| S(7)-Zn(1)    | 2.344(2)   |
| S(10B)-S(10A) | 0.705(10)  |

|                    |           |
|--------------------|-----------|
| C(2)-C(1)-S(1)     | 127.2(5)  |
| C(2)-C(1)-S(4)     | 114.8(5)  |
| S(1)-C(1)-S(4)     | 118.0(4)  |
| C(1)-C(2)-S(3)     | 116.1(5)  |
| C(1)-C(2)-S(2)     | 127.1(5)  |
| S(3)-C(2)-S(2)     | 116.8(3)  |
| S(5)-C(3)-S(4)     | 123.7(4)  |
| S(5)-C(3)-S(3)     | 124.0(5)  |
| S(4)-C(3)-S(3)     | 112.3(4)  |
| C(5)-C(4)-S(6)     | 126.7(5)  |
| C(5)-C(4)-S(9)     | 115.2(5)  |
| S(6)-C(4)-S(9)     | 118.2(4)  |
| C(4)-C(5)-S(8)     | 116.3(5)  |
| C(4)-C(5)-S(7)     | 126.5(5)  |
| S(8)-C(5)-S(7)     | 117.2(4)  |
| S(10B)-C(6)-S(10A) | 24.1(4)   |
| S(10B)-C(6)-S(8)   | 135.8(15) |
| S(10A)-C(6)-S(8)   | 112.3(14) |
| S(10B)-C(6)-S(9)   | 112.0(16) |
| S(10A)-C(6)-S(9)   | 135.6(14) |
| S(8)-C(6)-S(9)     | 112.0(4)  |
| N(1)-C(7)-C(10)    | 125.2(6)  |
| N(1)-C(8)-C(9)     | 124.4(6)  |
| C(8)-C(9)-C(11)    | 119.8(6)  |
| C(7)-C(10)-C(11)   | 118.8(5)  |
| C(9)-C(11)-C(10)   | 116.7(5)  |
| C(9)-C(11)-C(12)   | 121.9(5)  |
| C(10)-C(11)-C(12)  | 121.5(5)  |
| C(13)-C(12)-C(14)  | 117.5(5)  |

|                   |           |
|-------------------|-----------|
| C(13)-C(12)-C(11) | 121.0(5)  |
| C(14)-C(12)-C(11) | 121.5(5)  |
| C(16)-C(13)-C(12) | 120.3(5)  |
| C(15)-C(14)-C(12) | 120.1(5)  |
| N(2)-C(15)-C(14)  | 120.8(5)  |
| N(2)-C(16)-C(13)  | 121.0(5)  |
| N(2)-C(17)-C(18)  | 109.1(4)  |
| C(19)-C(18)-C(20) | 119.0(6)  |
| C(19)-C(18)-C(17) | 121.0(5)  |
| C(20)-C(18)-C(17) | 119.8(5)  |
| C(18)-C(19)-C(22) | 120.1(6)  |
| C(21)-C(20)-C(18) | 120.5(6)  |
| C(20)-C(21)-C(23) | 120.1(7)  |
| C(23)-C(22)-C(19) | 121.4(7)  |
| C(22)-C(23)-C(21) | 118.8(7)  |
| C(22)-C(23)-C(24) | 120.7(7)  |
| C(21)-C(23)-C(24) | 120.5(7)  |
| N(3)-C(24)-C(23)  | 110.2(6)  |
| C(28)-C(25)-N(3)  | 123.4(8)  |
| N(3)-C(26)-C(27)  | 119.5(12) |
| C(26)-C(27)-C(29) | 119.5(11) |
| C(25)-C(28)-C(29) | 122.2(9)  |
| C(28)-C(29)-C(27) | 115.3(9)  |
| C(28)-C(29)-C(30) | 124.8(8)  |
| C(27)-C(29)-C(30) | 119.8(9)  |
| C(32)-C(30)-C(31) | 114.4(11) |
| C(32)-C(30)-C(29) | 124.9(9)  |
| C(31)-C(30)-C(29) | 120.7(10) |
| C(30)-C(31)-C(33) | 120.8(13) |
| C(30)-C(32)-C(34) | 120.9(12) |
| N(4)-C(33)-C(31)  | 120.9(15) |
| N(4)-C(34)-C(32)  | 125.2(13) |
| C(7)-N(1)-C(8)    | 115.1(5)  |
| C(16)-N(2)-C(15)  | 120.2(5)  |
| C(16)-N(2)-C(17)  | 119.1(5)  |
| C(15)-N(2)-C(17)  | 120.6(4)  |
| C(26)-N(3)-C(25)  | 120.0(9)  |
| C(26)-N(3)-C(24)  | 120.0(9)  |
| C(25)-N(3)-C(24)  | 120.0(7)  |
| C(34)-N(4)-C(33)  | 117.8(13) |
| C(1)-S(1)-Zn(1)   | 95.1(2)   |
| C(2)-S(2)-Zn(1)   | 94.61(19) |
| C(3)-S(3)-C(2)    | 97.9(3)   |
| C(3)-S(4)-C(1)    | 98.8(3)   |
| C(4)-S(6)-Zn(1)   | 94.4(2)   |
| C(5)-S(7)-Zn(1)   | 93.9(2)   |

|                    |           |
|--------------------|-----------|
| C(6)-S(8)-C(5)     | 98.2(4)   |
| C(6)-S(9)-C(4)     | 98.3(4)   |
| S(1)-Zn(1)-S(2)    | 95.68(6)  |
| S(1)-Zn(1)-S(7)    | 112.04(7) |
| S(2)-Zn(1)-S(7)    | 117.61(6) |
| S(1)-Zn(1)-S(6)    | 124.58(6) |
| S(2)-Zn(1)-S(6)    | 114.85(6) |
| S(7)-Zn(1)-S(6)    | 93.88(6)  |
| S(10A)-S(10B)-C(6) | 78(2)     |
| S(10B)-S(10A)-C(6) | 78(2)     |

\*\*\*\*\*
